# Supplementary material for: The CfMK1 Gene Regulates Reproduction, Appressorium Formation, and Pathogenesis in a Pear Anthracnose-Causing Fungus
Source: MDPI journal article supplement (doi:10.3390/jof8010077), 2022-01-14
Supplement: s1 [file s1]

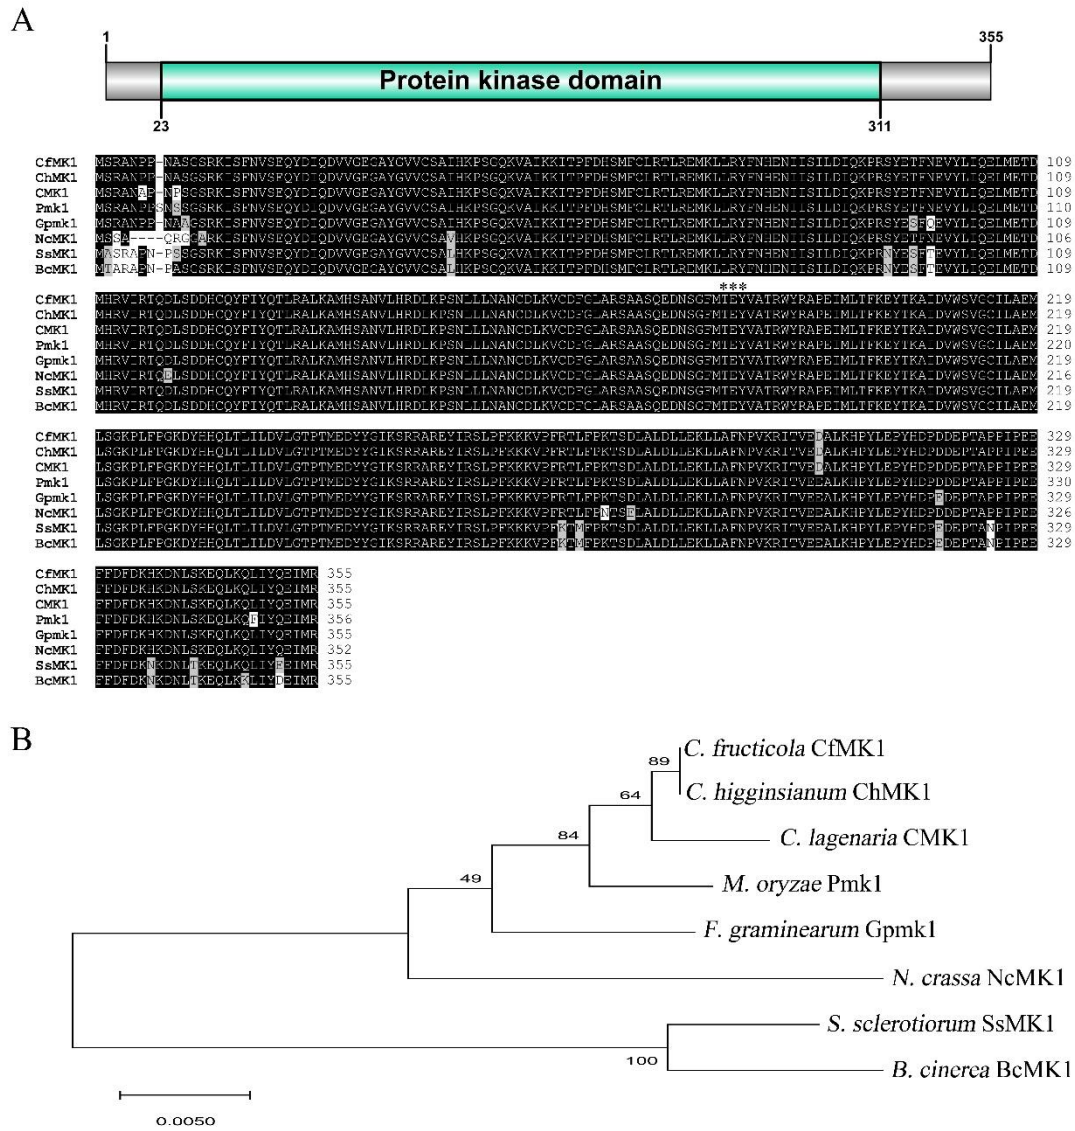

**Fig. S1** Characterization of the MAPK CfMK1 in *C. fruticola*. **(A)** Domain structure and amino acid sequence alignment of CfMK1. **(B)** Phylogenetic analysis of CfMK1 and its homologs from other fungi.

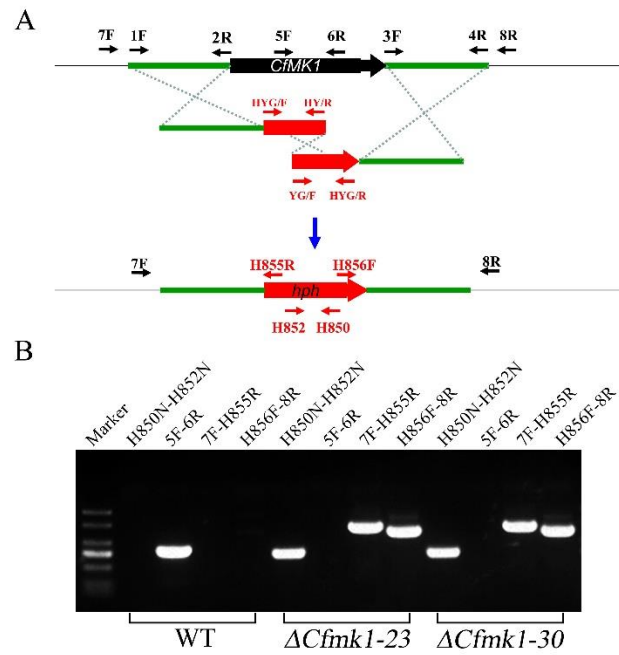

**Fig. S2** Generation of *CfmK1* gene deletion mutants. **(A)** Schematic diagram of gene deletion with the split-marker approach. The primers used for gene replacement and screening are listed in Table S1. **(B)** Deletion mutants were detected by four pairs of primers (Table S1). Hph, hygromycin.
